# Supplementary material
Source: Springer Nature journal article supplement (https://www.springermedizin.de/resource/supplementary/12885_2013_4534_MOESM1_ESM.pdf/9466644)
Supplement: MOESM1 [file 9466644]

---

**Table S1.** Sequence of quantitative PCR Primers

---

| Primer | Sense Sequence                                       |
|--------|------------------------------------------------------|
| MMP1   | TGGACCTGGAGGAAATCTTGC<br>AGAGTCCAAGAGAATGGCCGA       |
| MMP12  | CGGGCCTAAAATTGATGCA<br>GGTGATACGTTGGAGTAGGAAGTCA     |
| MMP13  | TGTTTCTTGTTGCTGCG<br>TGTTTAGGGTTGGGGTC               |
| MMP28  | CCGTCCACTGCAGGAAAGAT<br>CATCGACCCCCTTTGAAGAAG        |
| GAPDH  | TGGTATCGTGGAAGGACTCATGAC<br>ATGCCAGTGAGCTTCCCGTTCAGC |

---
